# Supplementary material
Source: PubMed Central journal article supplement (PMC1366981)
Supplement: biophysj_105.064485_1.pdf [file biophysj_105.064485_1.pdf]

**Table S1: Dataset: Pdb (21) codes of 232 proteins used in this analysis**

|      |      |      |      |      |      |      |      |      |      |      |      |      |      |
|------|------|------|------|------|------|------|------|------|------|------|------|------|------|
| 119l | 153l | 16pk | 1a12 | 1a2p | 1a2z | 1a3a | 1a68 | 1a6m | 1a8d | 1a8e | 1a8i | 1aay | 1aba |
| 1ads | 1agj | 1ajs | 1ako | 1amm | 1aoh | 1aqb | 1arb | 1aru | 1atg | 1atl | 1atz | 1avm | 1axn |
| 1ay7 | 1b0y | 1b3a | 1b4v | 1b5e | 1b8o | 1bd8 | 1bdo | 1beb | 1bfd | 1bfg | 1bgf | 1bj7 | 1bkf |
| 1bkr | 1bm8 | 1bs9 | 1bup | 1bx7 | 1bxa | 1byq | 1c52 | 1c8k | 1cem | 1cex | 1chd | 1cjc | 1cjw |
| 1cka | 1cmb | 1cnv | 1cnz | 1cor | 1cse | 1csh | 1ctf | 1cv8 | 1cyo | 1dci | 1dhn | 1din | 1dmr |
| 1dps | 1dpt | 1e7u | 1eca | 1edg | 1epw | 1eul | 1ezm | 1fgl | 1flt | 1fna | 1fnc | 1ftr | 1fvk |
| 1g8k | 1gdo | 1gof | 1gpe | 1gte | 1guq | 1h3n | 1h5u | 1h7w | 1hfc | 1hfe | 1hxn | 1hyp | 1iab |
| 1ida | 1iib | 1isu | 1ixh | 1jer | 1jhg | 1jz8 | 1k06 | 1k32 | 1kbl | 1kcw | 1kek | 1kid | 1koe |
| 1kpe | 1kpt | 1kqf | 1kuh | 1kve | 1l58 | 1l8a | 1lam | 1lcl | 1lfa | 1lkk | 1lmb | 1mfm | 1mla |
| 1mml | 1mof | 1mol | 1moq | 1mpg | 1mrj | 1msi | 1msk | 1mty | 1mug | 1nbc | 1nkd | 1nox | 1npk |
| 1nwp | 1oaa | 1one | 1opd | 1pcf | 1pdo | 1pgs | 1pj5 | 1pmi | 1poa | 1pot | 1ppn | 1psr | 1q16 |
| 1qcx | 1qdd | 1qhf | 1qnf | 1qre | 1r27 | 1ra9 | 1rcf | 1rge | 1rie | 1ryc | 1rzl | 1sbp | 1smd |
| 1svf | 1tag | 1tca | 1thv | 1tif | 1tph | 1tvx | 1tx4 | 1ubi | 1unk | 1uro | 1vfa | 1vfb | 1vfy |
| 1vhh | 1vie | 1vqb | 1wap | 1whi | 1xnb | 1yac | 1yge | 1zin | 256b | 2a0b | 2acy | 2ayh | 2baa |
| 2bbk | 2ccy | 2cpl | 2ctc | 2dri | 2end | 2hbg | 2igd | 2ilk | 2mcm | 2myr | 2nac | 2ohx | 2olb |
| 2por | 2pth | 2pvi | 2rn2 | 2sak | 2sic | 2sn3 | 2sns | 2tgi | 2tps | 2utg | 3chb | 3cyr | 3grs |
| 3pte | 3seb | 3vub | 4pga | 5hpg | 5pti | 6gsv | 8abp |      |      |      |      |      |      |

**Table S2: Normalization values of amino acid residues (17)**

| <b>Amino Acid</b> | <b>Normalization Values<br/>(<math>N_i</math>)<sup>1</sup></b> |
|-------------------|----------------------------------------------------------------|
| Ala               | 55.76                                                          |
| Arg               | 93.79                                                          |
| Asn               | 73.41                                                          |
| Asp               | 75.15                                                          |
| Cys               | 54.95                                                          |
| Gln               | 78.13                                                          |
| Glu               | 78.83                                                          |
| Gly               | 47.31                                                          |
| His               | 83.74                                                          |
| Ile               | 67.95                                                          |
| Leu               | 72.25                                                          |
| Lys               | 69.61                                                          |
| Met               | 69.26                                                          |
| Phe               | 93.31                                                          |
| Pro               | 51.33                                                          |
| Ser               | 61.39                                                          |
| Thr               | 63.71                                                          |
| Trp               | 106.70                                                         |
| Tyr               | 100.72                                                         |
| Val               | 62.37                                                          |

<sup>1</sup>: The normalization values of the 20 amino acids ( $N_i$ ) are given here. The combinations of these values like  $\sqrt{N_i \times N_j}$ ,  $(N_i + N_j)/2$  and  $\min(N_i, N_j)$ , which have been used in the analysis, can be obtained from these values.

Figure S1a

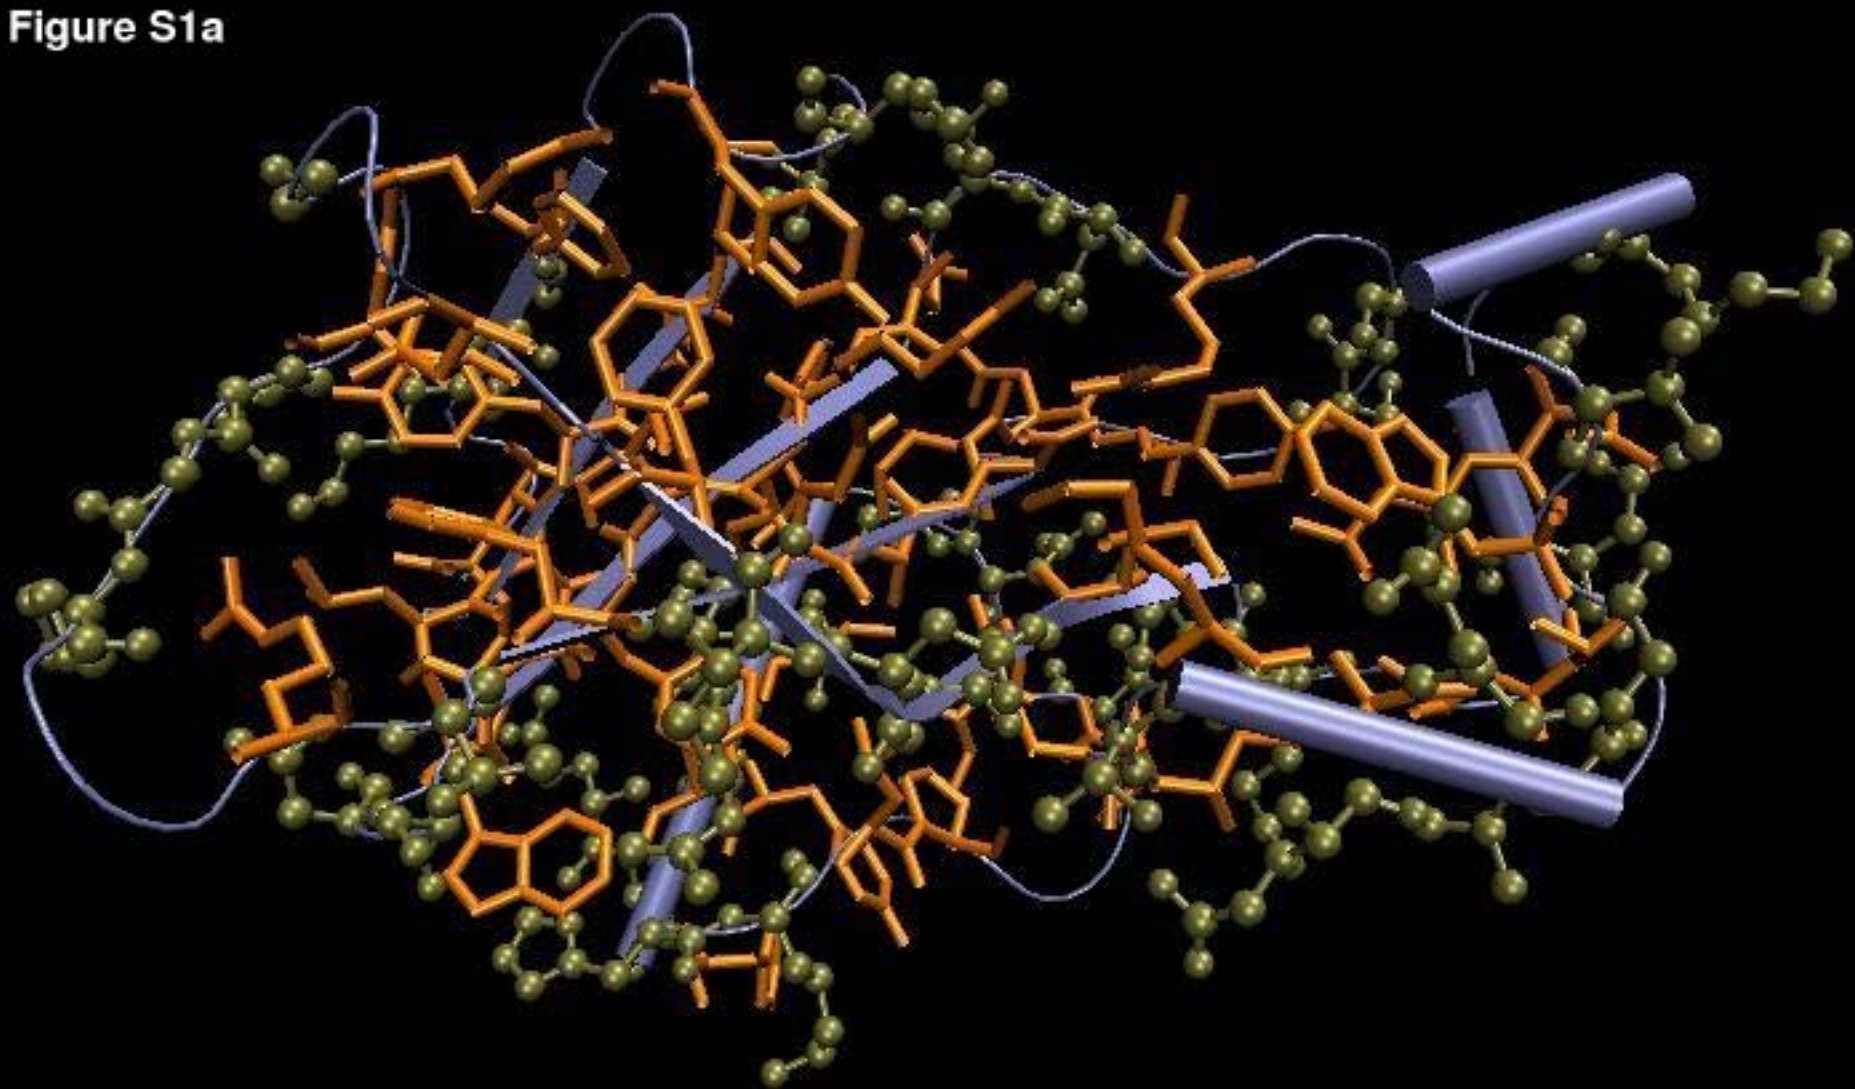

Figure S1b

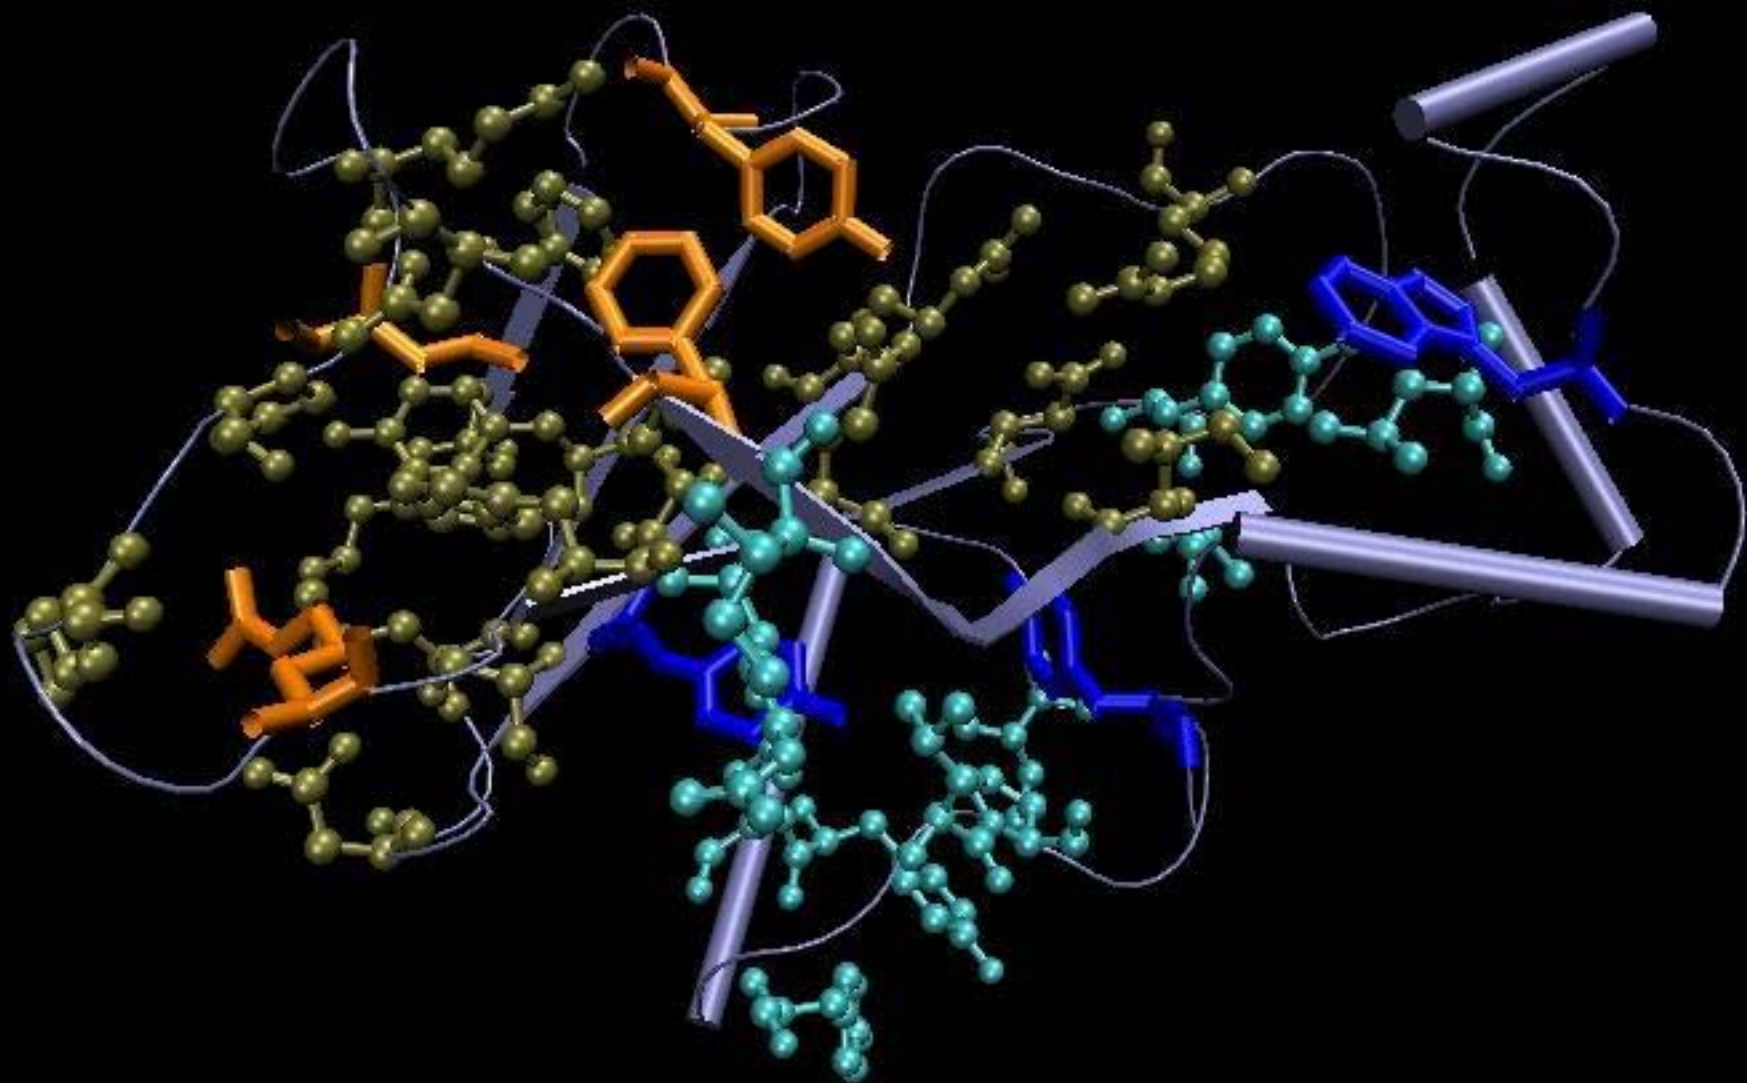

**Figure S2: Multiple sequence alignment of Carboxypeptidases:**

|      |                                                                |     |
|------|----------------------------------------------------------------|-----|
| 2CTC | TYHTLDEIYDFMDLLVAEHPQLVSKLQIGRSYEGRPYVVLKFS---TGGSNRPAIWIDLG   | 67  |
| 1PCA | TYHTLEEIYDFMDILVAEHPALVSKLQIGRSYEGRPYVVLKFS---TGGSNRPAIWIDSG   | 162 |
| 1DTD | AYHTLEEISQEMDNLVAEHPGLVSKVNISSFFENRPMNVLKFS---TGG-DKPAIWL DAG  | 60  |
| 1NSA | KYNNWETIEAWTEQVTSKNPDLISRSAIGTTFDGDNIYLLKVG---KPGSNKPAIFMDCG   | 153 |
| 1OBR | GYHNYNEMVNKINTVASNYPNIVKKFSIGKSYEGRELWAVKISDNVGTDENEPVLYTAL    | 67  |
| 1JQG | KIHSYEEVDAYLQELAKEFPNVVTVVEGGKSFEGRSIKYLRISTTNFQDASKPVVMMQSL   | 179 |
|      |                                                                |     |
| 2CTC | IHSREWITQATGVWFVFAKKFTEDYGQDPSFTAILDSDMIFLEIVTNPDG--FAFTHSQNRL | 125 |
| 1PCA | IHSREWITQASGVWFVFAKKITENYGNSSFTAILDSDMIFLEIVTNPNG--FAFTHSDNRL  | 220 |
| 1DTD | IHAREWVTQATALWTANKIVSDYGKDPSITSILDALDIFLLPVTNPDG--YVFSQTKNRM   | 118 |
| 1NSA | FHAREWISQAFCQWFVRDAVRTYGYEAHMTEFLDNLDFYVLPVLNIDG--YIYTWTKNRM   | 211 |
| 1OBR | HHAREHLTVEMALYTLDFLTQNYNLDNRITNLVNNREIYIVFNINPDGGEYDISSGSYKS   | 127 |
| 1JQG | LHCREWVTLPATLYAIHKLVIVTES----DLINNIDWIILPVANPDG--YVHTFGGDY     | 233 |
|      | <b>NE</b>                                                      |     |
|      |                                                                |     |
| 2CTC | WRKTRSVTSS--SLCVGVDANRNWDAGFGKAGASS-SPCSEYHKGKYANSEVEVKSIVDF   | 182 |
| 1PCA | WRKTRSKASG--SLCVGSDSNRNWDAGFGGAGASS-SPCAETYHKGYPNSEVEVKSITDF   | 277 |
| 1DTD | WRKTRSKVSAG-SLCVGVDPNRNWDAGFGGPGASS-NPCSDSYHGPSANSEVEVKSIVDF   | 176 |
| 1NSA | WRKTRSTNAG--SSCTGTDPNRNFNAGWCTVGASV-NPCNETYCGSAAESEKETKALADF   | 268 |
| 1OBR | WRKNRQPNNG--SSYVGTDLNRNNGYKWKCCGGSSGSPSSETYRGRSAFSAFETAAMRDF   | 185 |
| 1JQG | WRKNRATGYMAGNLGCMGVDLNRNFGMNVWGTASSSS--VCSDTFHGRSAFSEPESSVIRDI | 291 |
|      |                                                                |     |
| 2CTC | VKDH-----GNFKAFLSIHSYSQLLLYPYGYTTQSIIPDKTELNQVAKSAVEALKSLYGTS  | 237 |
| 1PCA | VKNN-----GNIKAFISIHSYSQLLLYPYGYKTQSPADKSELNQIAKSAVAALKSLYGTS   | 332 |
| 1DTD | IKSH-----GKVKAFIILHSYSQLLMFPYGYKCTKLDDFDELSEVAQKAAQSLSRHLHGK   | 231 |
| 1NSA | IRNNL----SSIKAYLTIHSYSQMILYPYSYDYKLPENDAELNSLAKGAVKELASLYGTS   | 324 |
| 1OBR | INSRVVGGKQOIKTLITFHTYSELILYPYGYTYTDVPSDMTQDDFNVFKTMANTMAQTNG   | 245 |
| 1JQG | IAEHR----NRMALYLDIHSFGSMILYGYG-NGVLP SNALQLHLIGVQMAQAIDRVKWSS  | 346 |
|      | <b>NC C E</b>                                                  |     |
|      |                                                                |     |
| 2CTC | ---YKYGSIITTIYQASGGSIDWSYNQGIKYSFTFEL---RDTGR-YGFLLPASQIIPTA   | 290 |
| 1PCA | ---YKYGSIITVIYQASGGVIDWTYNQGIKYSFSFEL---RDTGR-RGFLLPASQIIPTA   | 385 |
| 1DTD | ---YKVGPICSVIYQASGGSIDWSYDYGKYSFAFEL---RDTGR-YGFLLPARQILPTA    | 284 |
| 1NSA | ---YSYGPSTTIYPAAGGSDDWAYNQGIKYSFTFEL---RDKGR-FGFVLPESQIQATC    | 377 |
| 1OBR | ---YTP-QQASDLYITDGDMDTWAYGQHKIFAFTFEM---YPTSYPNGFYPPDEVIGRET   | 298 |
| 1JQG | NKDYIVGNIFHVLVYAAAGGASDYAMQAAAPFSYTYELPAYRNSVWFVDFGLVDPDFIEQAG | 406 |
|      | <b>E</b>                                                       |     |
|      |                                                                |     |
| 2CTC | QETWLGVLTIMEHTLNN----- 307                                     |     |
| 1PCA | QETWLALLTIMEHTLNNS----- 403                                    |     |
| 1DTD | EETWLGGLKAIMEHVRDHPY----- 303                                  |     |
| 1NSA | QETMLAVKYVTNYTLEHL----- 395                                    |     |
| 1OBR | SRNKEAVLYVAEKADCPYSVIGKSCSTK                                   | 326 |
| 1JQG | FETWEGIKVGARAAAAAAKELKKLNTA-                                   | 433 |

**Figure Legend:**

Multiple sequence alignments of carboxypeptidases obtained from Homstrad (29). Only those proteins with known structures are shown here in the alignment. 2ctc, 1pca, 1dtd, 1nsa, 1jgg are mesophilic carboxypeptidases. 1obr is a thermophilic carboxypeptidase. All the hub residues identified in 2ctc and 1obr (protein considered in the present study) at  $I_{\min}=4\%$  are highlighted in blue. The conservation profile of the hubs can be identified from the figure. An example each of *common* (**C**), *exclusive* (**E**), *non-exclusive* (**NE**) and *non-conserved* (**NC**) hubs (definitions are given in the text) are indicated below the corresponding residue in the alignment.

## Figure Caption for Supplementary Figures:

1. Figure S1: Clusters and hubs in Barnase (1RNB) at (a)  $I_{\min} = 0\%$  and (b)  $I_{\min} = 6\%$ . In both the figures, the protein tertiary structure is shown in blue colored cartoon representation. The hubs are shown in bond representation and other residues, which form clusters, are shown in ball and stick representation. Figure S1a shows a single big cluster in Barnase at  $I_{\min}=0\%$  (shown in tan colored ball and stick) with a large number of hubs (orange bonds). The big cluster splits up into two disjoint clusters at  $I_{\min} = 6\%$ , which are shown in tan and cyan colored ball and stick representation respectively in Figure S1b. The hubs in these two clusters are shown in orange and blue bonds respectively. There are three other smaller clusters with 3-4 residues in each occurring at  $I_{\min}=6\%$  in Barnase, which are not shown here in the interest of clarity. The hubs in both the Figures S1a and S1b are predominantly the aromatic residues. However, the hydrophobic residues also can be seen as hubs in Figure S1a, which have lost many interactions at  $I_{\min}=6\%$ , as can be seen by their absence in Figure S1b.

2. Figure S2: Multiple sequence alignments of carboxypeptidases obtained from Homstrad (29). Only those proteins with known structures are shown here in the alignment. 2ctc, 1pca, 1dtd, 1nsa, 1jqg are mesophilic carboxypeptidases. 1obr is a thermophilic carboxypeptidase. All the hub residues identified in 2ctc and 1obr (protein considered in the present study) at  $I_{\min}=4\%$  are highlighted in blue. The conservation profile of the hubs can be identified from the figure. An example each of *common* (C), *exclusive* (E), *non-exclusive* (NE) and *non-conserved* (NC) hubs (definitions are given in the text) are indicated below the corresponding residue in the alignment.
